# Supplementary material
Source: PubMed Central journal article supplement (PMC4904782)
Supplement: NIHMS788315-supplement-supplement_1.pdf [file NIHMS788315-supplement-supplement_1.pdf]

## By-Laws: OCHIN Patient Engagement Panel (PEP)

### OCHIN Mission Statement

OCHIN is a nonprofit healthcare innovation center. OCHIN is designed to provide knowledge solutions that promote quality, affordable healthcare to all.

### Patient Engagement Panel (PEP) Vision Statement

Patients offer important opinions and suggestions regarding healthcare. The Patient Engagement Panel (PEP) will ensure that patient “voices” are heard. PEP members will work with policy makers, providers, and researchers to improve patients' healthcare experiences. PEP members will also help to shape the vision of the OCHIN Practice-Based Research Network (PBRN).

### Patient Engagement Panel Purpose

PEP members will be asked to share their thoughts on:

- Research questions
- Changes to healthcare delivery
- How healthcare delivery impacts patients
- How to best share information with the general public
- How to best recruit patients for studies
- Health technology

### *A member of the Patient Engagement Panel can expect to:*

- Share their opinions about recruitment models, changes to how clinics work, and sharing project findings.
- Attend monthly meetings to share their thoughts and opinions about different topics.
- Patients may choose to be “on-call” to answer questions about research studies. If you do this, you will be contacted no more than 4 times per year.

### Why Join the Patient Engagement Panel?

- **You will help build better research studies.**
- **Gain experience and understanding of research** taking place in doctor’s offices.
- **Work together with researchers** to help people live healthier lives.
- **Help your community understand current research findings** by shaping the way people find out about these results.

### What Will I Receive for Participating?

PEP members will receive gift cards for participating. You will receive gift cards based on the time you spend with us. This is what you will receive:

| <b>Hours Spent Working with US</b> | <b>Gift Card Amount</b><br><i>(To a Department Store of Your Choice)</i> |
|------------------------------------|--------------------------------------------------------------------------|
| 1-3 hours                          | \$25                                                                     |
| 4-6 hours                          | \$50                                                                     |
| 7-9 hours                          | \$75                                                                     |
| 10-12 hours                        | \$100                                                                    |
| 13-15 hours                        | \$150                                                                    |

### Patient Engagement Panel Incentives

The PEP strives to include patients from all walks of life. PEP members may represent OCHIN member sites, other healthcare organizations, and/or community groups locally and nationally. The OCHIN Patient Engagement Coordinator will work with members to set agendas and schedule meetings. The PEP meets once a month for one (1) hour at OCHIN headquarters in Portland, Oregon. Some members will participate via toll-free calls and screen-sharing technology.

### Norms and Expectations

- Treat each other with dignity and respect
- Make every effort to come to meetings and events on time
- Come prepared to meetings and participate
- No interrupting or “cross-talk”
- Refrain from cursing, swearing, or using derogatory language

### How do I Become Involved?

For more information, please contact Nate Warren, Patient Engagement Coordinator at OCHIN, at [warrenn@ochin.org](mailto:warrenn@ochin.org), or by phone at 503.943.2568.

### Signature of Member

I have read and agree with the Patient Engagement Panel by-laws and have signed and printed below.

\_\_\_\_\_  
Signature of patient, or legal representative

\_\_\_/\_\_\_/\_\_\_  
Date

\_\_\_\_\_  
Printed name of patient, or patient’s legal representative

\_\_\_\_\_  
Legal representative’s relationship to the patient
